# Supplementary material
Source: ML conference proceedings conference paper supplement (https://proceedings.neurips.cc/paper_files/paper/2009/hash/b6f0479ae87d244975439c6124592772-Abstract.html)
Supplement: Supplementary file 1 [file b6f0479ae87d244975439c6124592772-Supplemental.zip]

Archive with 1 entries (1 files):
- extra/NIPS2009_0420_extra.pdf
